# Supplementary material for: Apolipoprotein M Gene (APOM) Polymorphism Modifies Metabolic and Disease Traits in Type 2 Diabetes
Source: PubMed Central journal article supplement (PMC3044746; doi:10.1371/journal.pone.0017324), 2011-02-24
Supplement: pone.0017324.s006.pdf [file pone.0017324.s006.pdf]

**Table S1.**

| Primer           | Sequence                                  |
|------------------|-------------------------------------------|
| 5'RACE-YY1       | 5'-AATGGGGTGGGGGAGAACGT3'                 |
| 5'RACE-YY2       | 5'-GCTGATGGCGATGAATGAACACTG-3'            |
| 5'RACE-YY3       | 5'-CCAGAACCCATCCTGCCTCCCTC-3'             |
| 5'RACE-YY4       | 5'-AACCCATCCTGCCTCCCTCA-3'                |
| 5'RACE-YY5       | 5'-CGCGGATCCGAACGCTGCGTTTGCTGGCTTTGATG-3' |
| 3'RACE-YY6       | 5'-CTGGGCGTGGATGGGAAGGAGTT-3'             |
| 3'RACE-YY7       | 5'-GCGAGCACAGAATTAATACGACT-3'             |
| 3'RACE-YY8       | 5'-GGCCGCCCTGACATGAAGACTGA-3'             |
| 3'RACE-YY9       | 5'-CGCGGATCCGAATTAATACGACTCACTATAGG-3'    |
| 3'RACE-YY10      | 5'-GGCCAGGGTTACCAGCGCTTCT-3'              |
| 3'RACE-YY11      | 5'-AAGGGAAGTCCAGGGAGAAAAGCAAAG-3'         |
| RT-PCR-YY12      | 5'-GTACTCGAGATGTTCCACCAAATTTGGG-3'        |
| RT-PCR-YY13      | 5'-GCTAAGCTTGTTATTGGACAGCTCACAG-3'        |
| RT-PCR-YY14      | 5'-GCTAAGCTTCCCTGTAACACCAGAAGAC-3'        |
| RT-PCR-YY15      | 5'-GTCGGTACCTTCCACCAAATTTGGGCAGC-3'       |
| RT-PCR-YY16      | 5'-GTCGGCCGCTCAGTTATTGGACAGCTCACAGGC-3'   |
| RT-PCR-YY17      | 5'-GTCGGCCGCTCACCTGTAACACCAGAAGACTTG-3'   |
| RT-PCR-Tao1      | 5'-ATCTCTGCCCCCTCTGCTGA-3'                |
| RT-PCR-Tao2      | 5'-GGATGACCTTGCCACAGGGT-3'                |
| T7               | 5'-TAATACGACTCACTATAGGG-3'                |
| pEGFPN1-for      | 5'-GTCGTAACAACCTCCGCC-3'                  |
| pEGFPN1-rev      | 5'-GTCCAGCTCGACCAGGATG-3'                 |
| CMV-For          | 5'-CGCAAATGGGCGGTAGGCGTG-3'               |
| Mutagenesis-YY18 | 5'-CAAGGTAAGGIGTTAAAATC-3'                |
| Mutagenesis-YY19 | 5'-GATTTTAACACCTTACCTTG-3'                |
